# Supplementary material for: Versatile thiolated thermosensitive polymers synthesized by ATRP of MEO2MA and AcSEMA, a new methacrylic monomer with a protected thiol group
Source: Royal Society of Chemistry journal article supplement (doi:10.1039/c3py00773a), 2013-01-01
Supplement: c3py00773a.pdf [file c3py00773a.pdf]

## Electronic Supplementary Information

# Versatile thiolated thermosensitive polymers synthesized by ATRP of MEO<sub>2</sub>MA and AcSEMA, a new methacrylic monomer with a protected thiol group.

Marta Liras, Olga García, Nekane Guarrotxena,  
Marta Palacios-Cuesta and Isabel Quijada-Garrido

### 1 Characterization of P(MEO<sub>2</sub>MA-*co*-AcSEMA) copolymers

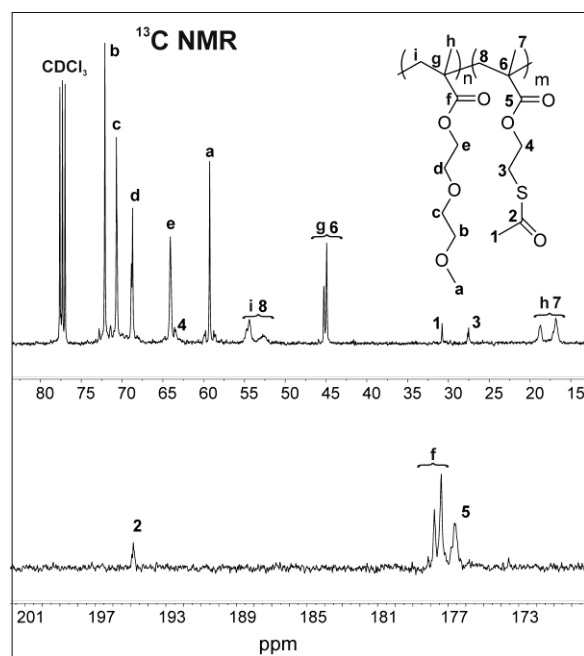

**Figure S-1.** <sup>13</sup>C NMR spectrum corresponding to the copolymer with 10 % mol AcSEMA

## 2 LCST dependence on pH for thiolated copolymers

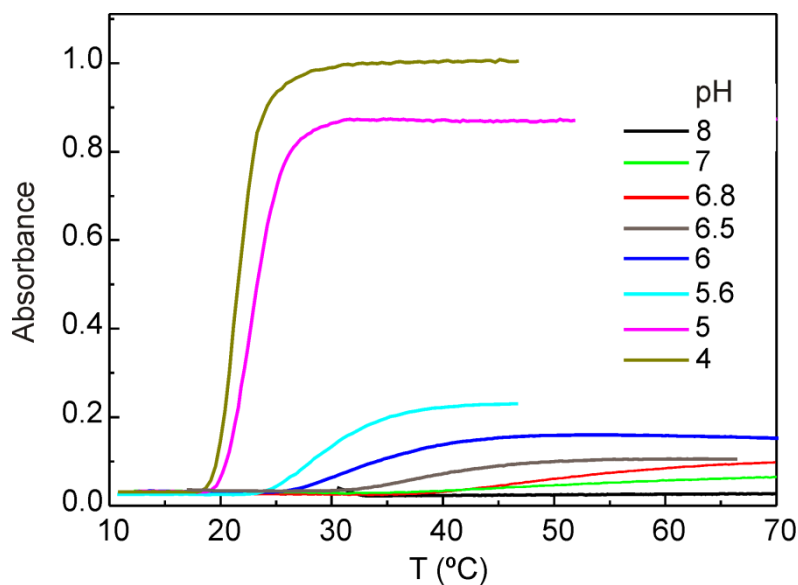

**Figure S-2.** LCST dependence on pH for hydrolyzed copolymer with 10 mol% of SEMA

## 3 Michael addition of AcSEAc with model acrylates

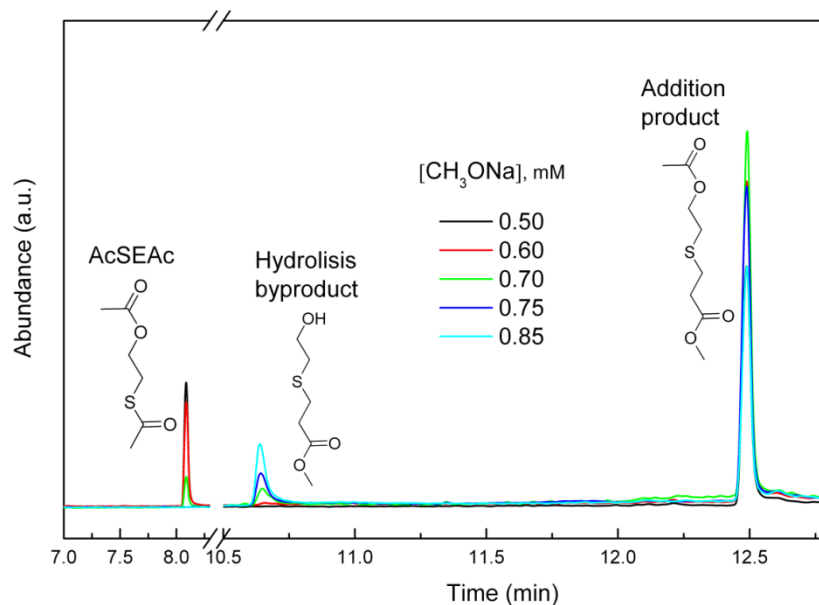

**Figure S-3.** In situ hydrolysis of AcSEAc and Michael addition with MA in solutions of sodium methoxide in acetonitrile. Reaction time: 40 min.

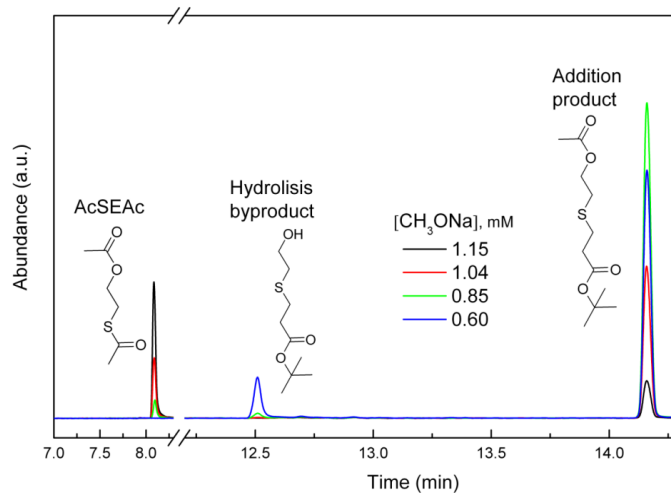

**Figure S-4.** In situ hydrolysis of AcSEAc and Michael addition with *t*BA in solutions of sodium methoxide in acetonitrile. Reaction time: 40 min.

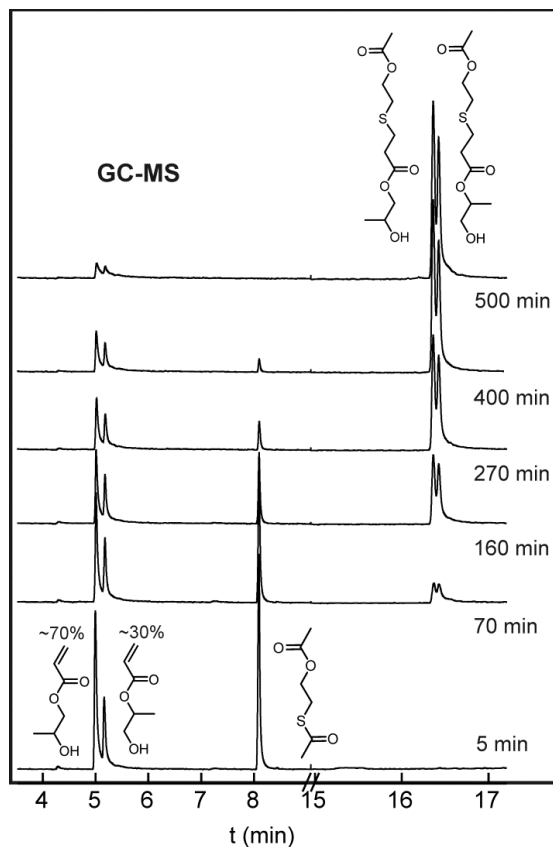

**Figure S-5.** Michael addition between AcSEAc and HPA in  $\text{NH}_3(\text{aq.})/\text{Acetonitrile}$  monitored by GC-MS.

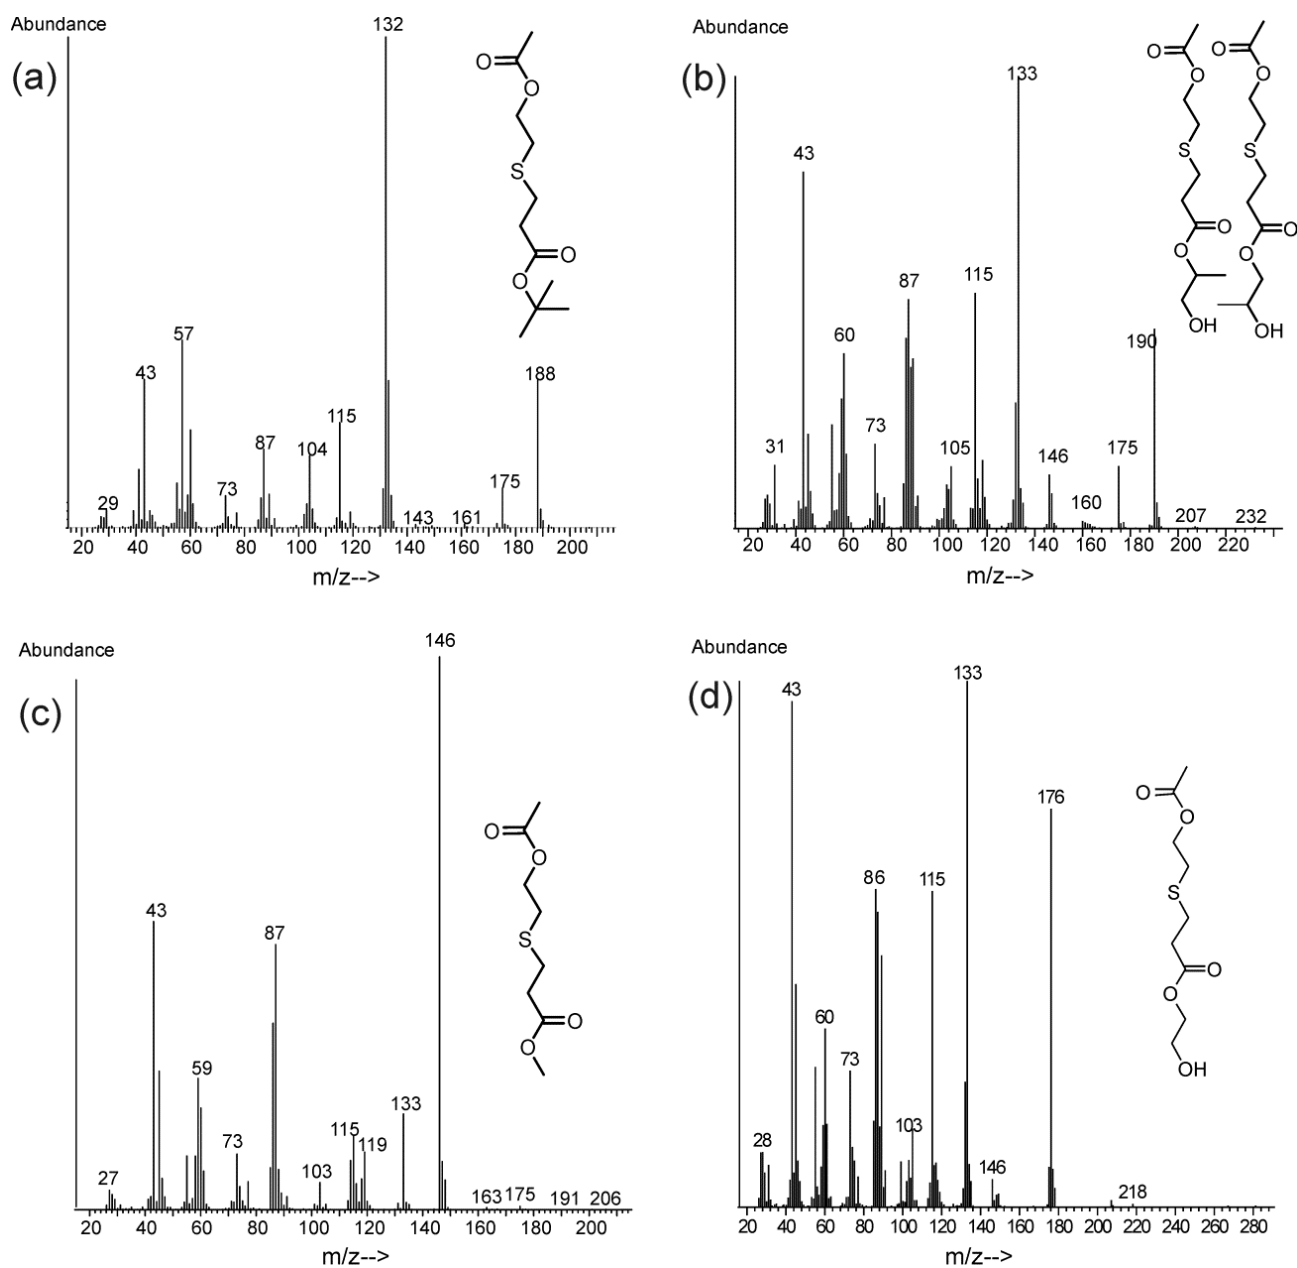

**Figure S-6.** Mass spectra corresponding to the sulfides products of the model reactions of AcSEAc with (a) *t*BA, (b) HPA, (c) MA and (d) HEA
